# Supplementary material for: Risk factors for postoperative surgical site infections after anterior cruciate ligament reconstruction: a systematic review and meta-analysis
Source: PubMed Central journal article supplement — Br J Sports Med. 2022 Dec 14;57(2):118–28. doi: 10.1136/bjsports-2022-105448 (PMC9872252; doi:10.1136/bjsports-2022-105448), 2022-12-14
Supplement: bjsports-2022-105448supp001.pdf [file bjsports-2022-105448supp001.pdf]

**Supplementary Material A1** The search strategy for PubMed

#1 ("Anterior Cruciate Ligament Reconstruction"[Mesh]) OR (Anterior Cruciate Ligament Reconstruction[Title/Abstract])

#2 ("Infections"[Mesh]) OR ((Infection[Title/Abstract]) OR (Septic Arthritis[Title/Abstract]))

#3 ("Risk Factors"[Mesh]) OR (((((Risk Factor[Title/Abstract]) OR (factor[Title/Abstract])) OR (factors[Title/Abstract])) OR (predictors[Title/Abstract])) OR (predictor[Title/Abstract]))

#1 AND #2 AND #3

**Supplementary Material A2** Quality appraisal of included studies

| Quality appraisal   | Reporting |   |   |   |   |   |    | External validity | Internal validity- Bias |    |    |    | Internal validity- confounding (selection bias) |    |    |    | Po wer | The sum of each item (Summary score) <sup>a</sup> |
|---------------------|-----------|---|---|---|---|---|----|-------------------|-------------------------|----|----|----|-------------------------------------------------|----|----|----|--------|---------------------------------------------------|
|                     | 1         | 2 | 3 | 5 | 6 | 7 | 10 |                   | 11                      | 12 | 15 | 16 | 18                                              | 20 | 21 | 22 |        |                                                   |
| Abram 2019          | 1         | 1 | 1 | 1 | 1 | 1 | 0  | 1                 | 0                       | 0  | 1  | 1  | 2                                               | 1  | 1  | 1  | 1      | 15 (79)                                           |
| Barker 2010         | 1         | 1 | 1 | 0 | 1 | 1 | 1  | 1                 | 0                       | 0  | 1  | 1  | 1                                               | 1  | 1  | 0  | 0      | 12 (63)                                           |
| Bohu 2019           | 1         | 1 | 1 | 2 | 1 | 1 | 1  | 1                 | 0                       | 0  | 1  | 1  | 2                                               | 1  | 1  | 1  | 0      | 16 (84)                                           |
| Brophy 2015         | 1         | 1 | 1 | 2 | 1 | 1 | 1  | 1                 | 0                       | 0  | 1  | 1  | 1                                               | 1  | 1  | 1  | 0      | 15 (79)                                           |
| Brophy 2021         | 1         | 1 | 1 | 0 | 1 | 1 | 1  | 1                 | 0                       | 0  | 0  | 0  | 1                                               | 1  | 1  | 0  | 0      | 10 (53)                                           |
| Cancienne 2016      | 1         | 1 | 1 | 2 | 1 | 1 | 1  | 1                 | 0                       | 0  | 1  | 1  | 2                                               | 1  | 1  | 1  | 1      | 17 (89)                                           |
| Greenberg 2010      | 1         | 1 | 1 | 0 | 1 | 1 | 0  | 1                 | 0                       | 0  | 1  | 0  | 1                                               | 1  | 1  | 0  | 0      | 10 (53)                                           |
| Gupta 2018          | 1         | 1 | 1 | 2 | 1 | 1 | 1  | 1                 | 0                       | 0  | 1  | 1  | 2                                               | 1  | 1  | 1  | 0      | 16 (84)                                           |
| Hurvitz 2020        | 1         | 1 | 1 | 1 | 1 | 1 | 1  | 1                 | 0                       | 0  | 1  | 1  | 2                                               | 1  | 1  | 1  | 0      | 15 (79)                                           |
| Judd 2006           | 1         | 1 | 1 | 1 | 1 | 1 | 0  | 1                 | 0                       | 0  | 1  | 0  | 1                                               | 1  | 1  | 0  | 0      | 11 (58)                                           |
| Katz 2008           | 1         | 1 | 1 | 2 | 1 | 1 | 1  | 1                 | 0                       | 0  | 1  | 1  | 1                                               | 1  | 1  | 1  | 0      | 15 (79)                                           |
| Kawata 2018         | 1         | 1 | 1 | 2 | 1 | 1 | 1  | 1                 | 0                       | 0  | 1  | 1  | 1                                               | 1  | 1  | 1  | 1      | 16 (84)                                           |
| Kraus 2021          | 1         | 1 | 1 | 2 | 1 | 1 | 1  | 1                 | 0                       | 0  | 1  | 1  | 2                                               | 1  | 1  | 1  | 1      | 17 (89)                                           |
| Krutsch 2017        | 1         | 1 | 1 | 0 | 1 | 1 | 1  | 1                 | 0                       | 0  | 1  | 1  | 2                                               | 1  | 1  | 0  | 0      | 13 (68)                                           |
| Leroux 2014         | 1         | 1 | 1 | 0 | 1 | 1 | 1  | 1                 | 0                       | 0  | 1  | 1  | 1                                               | 1  | 1  | 1  | 0      | 13 (68)                                           |
| Maletis 2013        | 1         | 1 | 1 | 1 | 1 | 1 | 1  | 1                 | 0                       | 0  | 1  | 1  | 2                                               | 1  | 1  | 1  | 1      | 16 (84)                                           |
| Marom 2022          | 1         | 1 | 1 | 2 | 1 | 1 | 1  | 1                 | 0                       | 0  | 1  | 1  | 1                                               | 1  | 1  | 1  | 1      | 16 (84)                                           |
| Murphy 2016         | 1         | 1 | 1 | 2 | 1 | 1 | 1  | 1                 | 0                       | 0  | 0  | 1  | 1                                               | 1  | 1  | 1  | 1      | 15 (79)                                           |
| RISTIĆ 2014         | 1         | 1 | 1 | 0 | 1 | 0 | 0  | 1                 | 0                       | 0  | 0  | 1  | 0                                               | 1  | 1  | 0  | 0      | 8 (42)                                            |
| Roecker 2021        | 1         | 1 | 1 | 1 | 1 | 1 | 1  | 1                 | 0                       | 0  | 1  | 1  | 1                                               | 1  | 1  | 1  | 1      | 15 (79)                                           |
| Sonnery-Cottet 2011 | 1         | 1 | 0 | 0 | 1 | 1 | 1  | 1                 | 0                       | 0  | 1  | 1  | 1                                               | 1  | 1  | 1  | 0      | 12 (63)                                           |
| Sonnery-Cottet 2019 | 1         | 1 | 1 | 2 | 1 | 1 | 1  | 1                 | 0                       | 0  | 0  | 1  | 1                                               | 1  | 1  | 1  | 0      | 14 (74)                                           |
| Westermann 2017     | 1         | 1 | 1 | 2 | 1 | 1 | 1  | 1                 | 0                       | 1  | 1  | 1  | 1                                               | 1  | 1  | 1  | 0      | 16 (84)                                           |

<sup>a</sup>The checklist comprised a maximum score of 19 points. A summary score (the sum of each item divided by the total score) ranging

from 0 to 100.

### Supplementary Material A3 Quality modified checklist from Downs and Black

|    | ITEM                                                                                                                         | Yes                                                | Unable to determine/No |
|----|------------------------------------------------------------------------------------------------------------------------------|----------------------------------------------------|------------------------|
| 1  | Is the hypothesis/aim/objective of the study clearly described?                                                              |                                                    |                        |
| 2  | Are the main outcomes to be measured clearly described in the Introduction or Methods sections?                              |                                                    |                        |
| 3  | Are the characteristics of the subjects included in the study clearly described?                                             |                                                    |                        |
| 5  | Are the distributions of principle confounders in each group of subjects to be compared clearly described?                   | partially                                          |                        |
| 6  | Are the main findings of the study clearly described?                                                                        |                                                    |                        |
| 7  | Does the study provide estimates of the random variability in the data for the main outcome?                                 |                                                    |                        |
| 10 | Have actual probability values been reported (e.g. 0.035 rather than                                                         |                                                    |                        |
| 11 | Were the subjects asked to participate in the study representative to the entire population from which they were recruited?  |                                                    |                        |
| 12 | Were those subjects who were prepared to participate representative of the entire population from which they were recruited? |                                                    |                        |
| 15 | Was an attempt made to blind those measuring the main outcome?                                                               |                                                    |                        |
| 16 | If any of the results was based on “data dredging”, was this made clear?                                                     |                                                    |                        |
| 18 | Were the statistical tests used to assess the main outcomes appropriate?                                                     |                                                    |                        |
| 20 | Were the main outcome measures used accurate (valid and reliable)?                                                           | Accuracy not reported but method clearly described |                        |
| 21 | Were the subjects (e.g. the two groups to be compared) recruited from the same population?                                   |                                                    |                        |
| 22 | Were the study subjects (the two groups to be compared) recruited over the same period of time?                              |                                                    |                        |
| 25 | Were there adequate adjustments for confounding in the analyses from which the main findings                                 |                                                    |                        |

---

were drawn?

- 27 Did the study have sufficient power to detect a clinically important effect?

---

Note: Every question was given 1 point for “yes” and zero points for “unable to determine” and “no” except for item 5 and 20. Item 5 was given 2 points for “yes”, 1 point for “partially” and zero points for “unable to determine” and “no”. Item 20 was given 2 points for “yes”, 1 point for “Accuracy not reported but method clearly described” and zero points for “unable to determine” and “no”.

### Supplementary Material A4 Incidence rate of surgical site infections after anterior cruciate ligament reconstruction

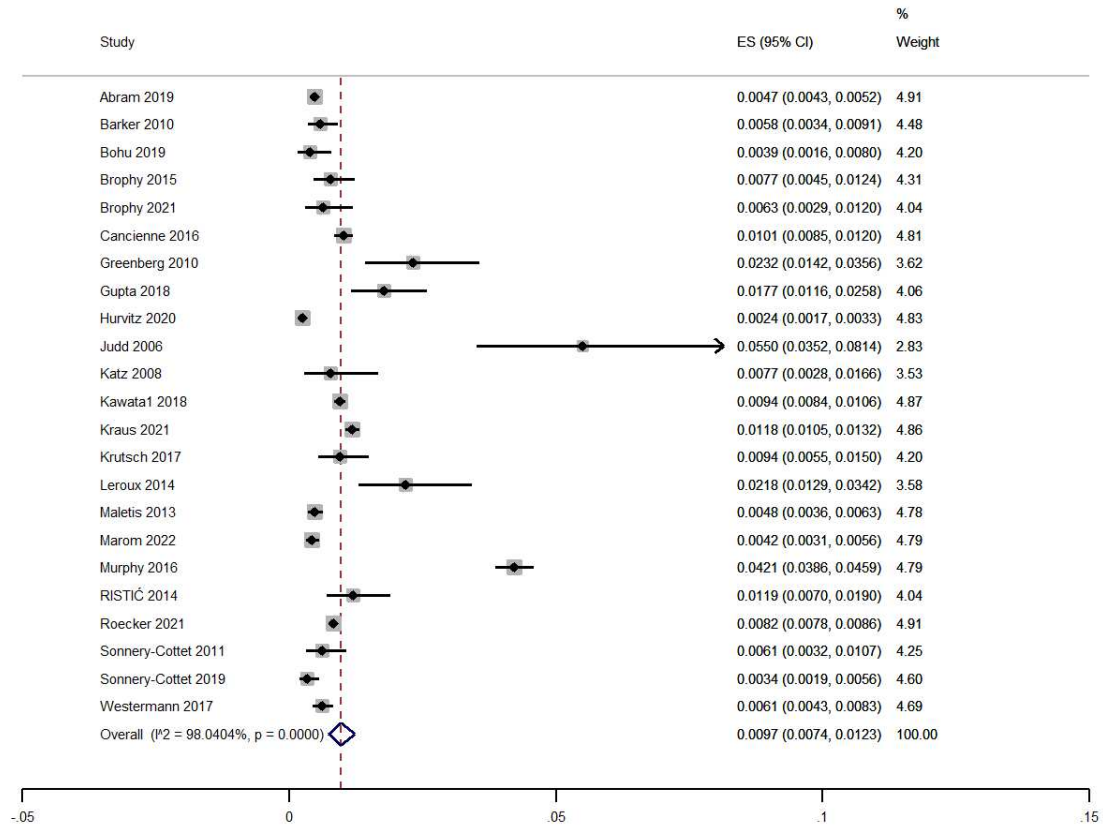

**Supplementary Material A5** The mean time from surgery to the onset of surgical site infection symptoms after anterior cruciate ligament reconstruction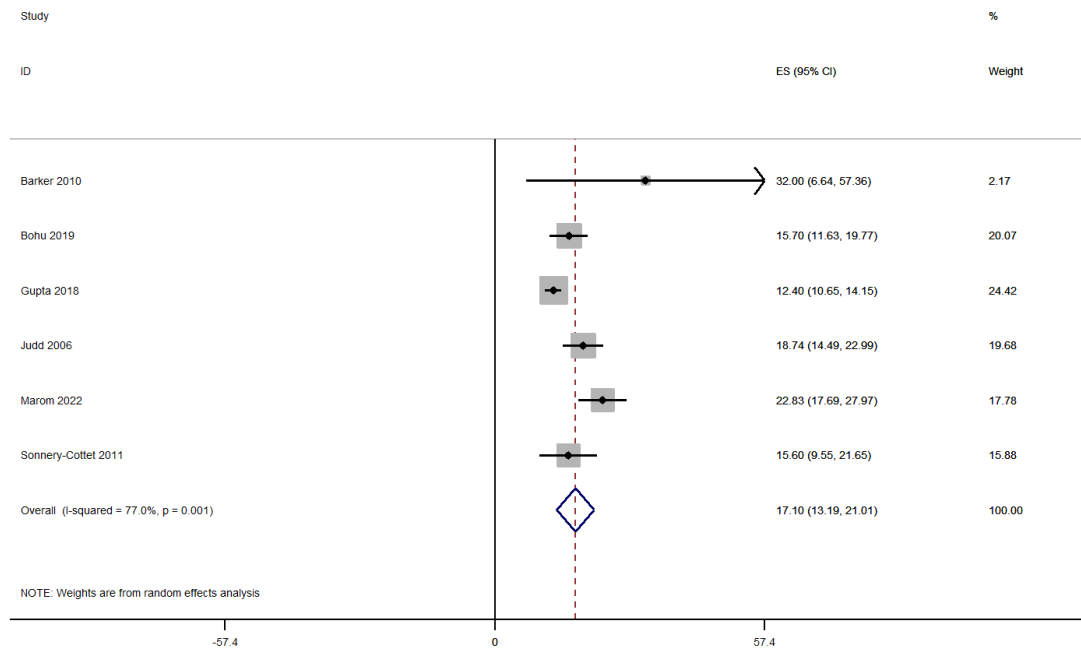

**Supplementary Material A6** Subgroup analysis of deep surgical site infections after anterior cruciate ligament reconstruction

| Potential risk factors                          | Studies included | OR/WMD             | 95% CI     | P value               | I-squared |
|-------------------------------------------------|------------------|--------------------|------------|-----------------------|-----------|
| Sex (males vs. females)                         | 9                | 1.93               | 1.61-2.31  | <0.00001 <sup>a</sup> | 9%        |
| Age                                             | 7                | -0.34 <sup>b</sup> | -2.18-1.49 | 0.71                  | 48%       |
| Obesity                                         | 2                | 1.99               | 0.72-5.47  | 0.18                  | 76%       |
| Tobacco user                                    | 5                | 1.22               | 0.85-1.76  | 0.28                  | 0%        |
| Diabetes mellitus                               | 6                | 4.54               | 1.27-16.32 | 0.02 <sup>a</sup>     | 65%       |
| Previous knee surgery history                   | 3                | 5.13               | 1.23-21.29 | 0.02 <sup>a</sup>     | 76%       |
| Professional athletes                           | 5                | 4.56               | 1.30-15.96 | 0.02 <sup>a</sup>     | 74%       |
| Outpatient surgery (vs. inpatient surgery)      | 3                | 1.20               | 0.91-1.59  | 0.19                  | 0%        |
| Revision surgery (vs. primary surgery)          | 5                | 2.05               | 1.03-4.06  | 0.04 <sup>a</sup>     | 60%       |
| Hamstring autograft (vs. BPTB autograft)        | 9                | 2.98               | 2.21- 4.03 | <0.00001 <sup>a</sup> | 16%       |
| Hamstring autograft (vs. allograft)             | 3                | 3.26               | 1.45-7.35  | 0.004 <sup>a</sup>    | 51%       |
| BPTB autograft (vs. allograft)                  | 4                | 0.43               | 0.16-1.16  | 0.10                  | 41%       |
| A concomitant lateral extra-articular tenodesis | 3                | 3.92               | 1.96-7.84  | 0.0001 <sup>a</sup>   | 0%        |

BPTB, bone–patellar tendon–bone. <sup>a</sup>Statistical significance; <sup>b</sup>WMD value.
